# Supplementary material for: Functional characterization of flavorings in electronic cigarette refill liquids by nuclear magnetic resonance spectroscopy
Source: Royal Society of Chemistry journal article supplement (doi:10.1039/c9ay02147g), 2019-12-11
Supplement: c9ay02147g1.pdf [file c9ay02147g1.pdf]

## Supplemental Information

Functional characterization of flavorings in electronic cigarette refill  
liquids by nuclear magnetic resonance spectroscopy

Oluwabunmi M. Dada, M.S.<sup>1</sup>, Marie-Cecile G. Chalbot, Ph.D.<sup>1,2</sup>, and Ilias G.  
Kavouras, Ph.D.<sup>1,3,\*</sup>

<sup>1</sup> Department of Environmental Health Sciences, University of Alabama at Birmingham,  
Birmingham, AL 35233

<sup>2</sup> Department of Chemical and Biomolecular Engineering, New York University, Brooklyn, NY  
11201

<sup>3</sup> Department of Environmental, Occupational and Geospatial Health Sciences, City University of  
New York, NY 10027

\* Corresponding Author: Graduate School of Public Health and Health Policy, City University of New  
York, NY 10027, USA. Tel.: 646-364-9628; E-mail: [ilias.kavouras@sph.cuny.edu](mailto:ilias.kavouras@sph.cuny.edu)

Table S1. The manufacturer, flavor and nicotine content of the refill e-liquids and, nicotine, propylene glycol, glycerol and non-exchangeable hydrogen types concentrations measured in this study

| Brand | Flavor            | Nicotine content (mg/ml) | Cluster | This study |                        |          |       |        |       |                  |      |       |
|-------|-------------------|--------------------------|---------|------------|------------------------|----------|-------|--------|-------|------------------|------|-------|
|       |                   |                          |         | Nicotine   | Propylene glycol mg/ml | Glycerol | H-C   | H-C-C= | H-C-O | O-CH-O and H-C=C | Ar-H | H-C=O |
| 1     | Blueberry cobbler | 12                       | I       | 15         | 482                    | 846      | 1210  | 918    | 3,987 | 97               | 741  | 94    |
| 1     | Blueberry cobbler | 24                       | I       | 25         | 456                    | 628      | 1345  | 1,183  | 1,260 | 75               | 779  | 153   |
| 1     | Blueberry         | 24                       | I       | 22         | 606                    | 453      | 1370  | 494    | 2,516 | 21               | 216  | 19    |
| 1     | Blueberry         | 12                       | I       | 13         | 669                    | 509      | 1035  | 646    | 2,100 | 39               | 214  | 13    |
| 1     | Cherry            | 12                       | I       | 15         | 336                    | 857      | 588   | 599    | 824   | 24               | 271  | 42    |
| 1     | Caramel cafe      | 24                       | I       | 21         | 347                    | 594      | 763   | 1,012  | 1,520 | 59               | 572  | 80    |
| 1     | Caramel cafe      | 12                       | I       | 13         | 487                    | 700      | 1,306 | 647    | 928   | 70               | 734  | 134   |
| 1     | Cherry            | 24                       | I       | 31         | 352                    | 903      | 514   | 1,054  | 707   | 16               | 306  | 40    |
| 1     | Carolina bold     | 12                       | I       | 10         | 512                    | 499      | 394   | 407    | 429   | 0                | 22   | 12    |
| 1     | Carolina bold     | 24                       | I       | 21         | 463                    | 528      | 352   | 35     | 430   | 2                | 29   | 4     |
| 1     | Glacier mint      | 24                       | II      | 22         | 586                    | 450      | 2,427 | 198    | 525   | 0                | 56   | 17    |
| 1     | Glacier mint      | 12                       | II      | 14         | 708                    | 573      | 2,226 | 640    | 450   | 5                | 73   | 31    |
| 1     | Gold leaf         | 12                       | II      | 13         | 428                    | 440      | 727   | 813    | 372   | 2                | 89   | 0     |
| 1     | Gold leaf         | 0                        | II      | 4          | 516                    | 553      | 774   | 512    | 554   | 4                | 95   | 5     |
| 1     | Gold leaf         | 24                       | II      | 26         | 497                    | 516      | 848   | 470    | 376   | 1                | 99   | 2     |
| 1     | Menthol           | 24                       | II      | 25         | 318                    | 728      | 1,847 | 309    | 483   | 11               | 340  | 40    |
| 1     | Menthol           | 12                       | II      | 13         | 454                    | 731      | 1,675 | 673    | 722   | 12               | 303  | 32    |
| 1     | Mint chocolate    | 12                       | II      | 12         | 684                    | 392      | 1,038 | 497    | 870   | 12               | 44   | 9     |
| 1     | Menthol           | 0                        | II      | 1          | 620                    | 614      | 1,552 | 129    | 523   | 19               | 226  | 28    |
| 1     | Mint chocolate    | 24                       | II      | 25         | 798                    | 432      | 1,098 | 368    | 658   | 3                | 76   | 1     |
| 1     | Strawberry mint   | 12                       | III     | 14         | 529                    | 740      | 1,712 | 817    | 1187  | 27               | 183  | 6     |
| 1     | Strawberry mint   | 24                       | III     | 27         | 472                    | 767      | 1,533 | 245    | 795   | 23               | 193  | 21    |

| Brand | Flavor             | Nicotine content<br>(mg/ml) | Cluster | This study |                              |          |      |        |       |                     |      |       |
|-------|--------------------|-----------------------------|---------|------------|------------------------------|----------|------|--------|-------|---------------------|------|-------|
|       |                    |                             |         | Nicotine   | Propylene<br>glycol<br>mg/ml | Glycerol | H-C  | H-C-C= | H-C-O | O-CH-O<br>and H-C=C | Ar-H | H-C=O |
|       |                    |                             |         |            |                              |          |      |        |       |                     |      |       |
| 1     | Tobacco            | 12                          | III     | 15         | 367                          | 959      | 299  | 705    | 669   | 22                  | 125  | 28    |
| 1     | Tobacco            | 24                          | III     | 28         | 476                          | 757      | 259  | 264    | 531   | 22                  | 127  | 24    |
| 1     | Vanilla            | 0                           | III     | 0          | 426                          | 643      | 359  | 62     | 238   | 14                  | 93   | 24    |
| 1     | Vanilla            | 24                          | III     | 19         | 352                          | 516      | 403  | 735    | 617   | 14                  | 214  | 35    |
| 2     | Berry mint         | 6                           | III     | 5          | 551                          | 576      | 1292 | 388    | 444   | 7                   | 75   | 11    |
| 1     | Vanilla            | 12                          | III     | 9          | 381                          | 549      | 281  | 439    | 480   | 12                  | 102  | 16    |
| 2     | Cherry             | 6                           | III     | 6          | 602                          | 595      | 397  | 229    | 446   | 9                   | 53   | 0     |
| 3     | Blood orange       | 10                          | IV      | 10         | 633                          | 698      | 2834 | 363    | 604   | 0                   | 4    | 0     |
| 2     | Gourmet crème      | 6                           | IV      | 5          | 526                          | 525      | 684  | 254    | 443   | 4                   | 53   | 20    |
| 2     | Tobacco            | 6                           | IV      | 4          | 460                          | 477      | 272  | 177    | 571   | 10                  | 20   | 11    |
| 2     | Watermelon         | 6                           | IV      | 5          | 570                          | 565      | 416  | 255    | 407   | 57                  | 87   | 11    |
| 3     | Peach tea          | 15                          | V       | 13         | 561                          | 487      | 589  | 580    | 334   | 57                  | 340  | 8     |
| 3     | Single malt scotch | 15                          | V       | 15         | 662                          | 625      | 1455 | 316    | 517   | 0                   | 39   | 4     |
| 3     | Blood orange       | 15                          | V       | 13         | 516                          | 590      | 2422 | 448    | 425   | 0                   | 7    | 0     |
| 3     | Single malt scotch | 10                          | V       | 9          | 636                          | 595      | 1359 | 381    | 410   | 0                   | 36   | 0     |
| 3     | Pomegranate        | 15                          | V       | 13         | 535                          | 523      | 604  | 677    | 335   | 7                   | 155  | 0     |
| 3     | Peach tea          | 10                          | V       | 9          | 554                          | 509      | 693  | 440    | 374   | 61                  | 345  | 0     |
| 3     | Vanilla bean       | 15                          | V       | 14         | 615                          | 578      | 454  | 542    | 741   | 44                  | 310  | 79    |
| 3     | Pomegranate        | 10                          | V       | 14         | 939                          | 860      | 921  | 732    | 697   | 17                  | 261  | 4     |
| 3     | Vanilla bean       | 10                          | V       | 10         | 664                          | 601      | 420  | 399    | 598   | 36                  | 304  | 53    |
